# Supplementary material for: Malignant pleural mesothelioma patients’ experience by gender: findings from a cross-sectional UK-national questionnaire
Source: PubMed Central journal article supplement — BMJ Open Respir Res. 2022 Jan 20;9(1):e001050. doi: 10.1136/bmjresp-2021-001050 (PMC8783831; doi:10.1136/bmjresp-2021-001050), 2022-01-20

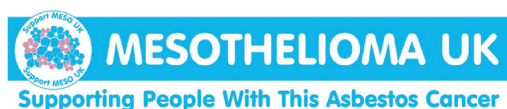

# Mesothelioma Outcomes, Research and Experience survey (MORE Survey).

Mesothelioma UK would like to invite mesothelioma patients to have the opportunity to describe what their experience of investigations, treatment and care has really been like.

The survey will enable Mesothelioma UK to inform health care providers about what is being done well, what could be improved and hopefully where there are variations in treatment and care. It will also assist Mesothelioma UK to develop its services to complement those of the NHS. Mesothelioma UK will make recommendations representing the patient experience and circulate these to the wider mesothelioma community and health care providers

Thank you for taking the time to complete the survey. I confirm that any details that you give on the survey will be completely anonymised.

Yours sincerely

Liz Darlison Head of Services

# Welcome to the Mesothelioma Outcomes Research and Experience (MORE) Survey. Please complete all 3 sections and ask your MESO UK nurse to check and validate section 3 before submitting

## Section 1

Information about you - your experience of care and treatment

Please enter the unique patient identifier supplied by your Meso UK nurse

Are you resident in the UK?

- Yes (if yes, please continue)  
 No (if no, please do not complete the study)

Q1.1. What is the first part of your home postcode?  
e.g. BS35





Q1.2. How old are you now?

- Under 18     46-50  
 19-25     51-55  
 26-30     56-60  
 31-35     61-65  
 36-40     66-70  
 41-45     70+

Q1.3. Are you

- Male     Female

## Asbestos exposure

Q1.4. From your memory were you ever exposed to asbestos?

- Yes, through my own work (please go to Q1.5)  
 Yes, through another person's work  
e.g. laundering clothing  
 Yes, my house contained asbestos e.g. whilst undertaking DIY  
 Yes, by living near to the asbestos industry  
 Don't know

Q1.5. If exposed at work, what was your occupation at that time?

- I was not or don't think I was exposed at work  
 Joiner or carpenter  
 Electrician  
 Plumber  
 Builder  
 Lagger  
 Teacher  
 Nurse  
 Doctor  
 Engineer  
 Secretarial or Admin  
 Other

Q1.6. Is there a history of mesothelioma in your family?

- Yes     No     Don't know

Q1.7. Since being diagnosed with Mesothelioma were you ever helped to identify where the asbestos exposure may have occurred?

- Yes     No

Q1.8. Have you ever been a member of the armed forces?

- Yes (if yes, please go to Q1.9)  
 No (if no, please go to Q1.11)

Q1.9. If you have been a member of the armed forces which service?

- Army  
 Royal Navy  
 Royal Airforce  
 Other

Q1.10. If you have been a member of the armed forces what was your length of service?

- Less than 5 years  
 5-10 years  
 10-15 years  
 15-20 years  
 More than 20 years

## Medical History

**Q1.11. To the best of your ability, can you recall the approximate date when you first experienced symptoms relating to your mesothelioma?**

- Yes (if yes, please go to Q1.12)  
 No (if no, please go to Q1.13)

**Q1.12. Date when first experienced symptoms**

Please write 1st of month and year

**Q1.13. To the best of your ability, can you recall the date you were diagnosed with mesothelioma?**

Please write 1st of month and year

**Q1.14. Can you remember approximately how many times you presented to your GP with symptoms related to mesothelioma before being referred to the hospital for further tests?**

- None  
 1-2  
 3-4  
 5+  
 Don't know

**Q1.15. In the last year, related to your mesothelioma, how many outpatient visits have you attended – ie in total for hospital visits, clinical appointments, scans, tests or treatment**

- None  16-20  
 1-5  20+  
 6-10  Don't know  
 11-15

**Q1.16. In the last year how many hospital admissions have you had related to mesothelioma?**

- None  
 1-2  
 3-4  
 5+  
 Don't know

**Q1.17. In the last year how many nights have you had to spend in hospital related to their mesothelioma?**

- None  16-20  
 1-5  20+  
 6-10  Don't know  
 11-15

## Your personal experience in the management of your mesothelioma

**Q1.18. Who was it that first told you about your mesothelioma diagnosis?**

- GP  
 Hospital doctor  
 Mesothelioma nurse specialist  
 Other nurse specialist  
 Relative or a friend  
 Nobody, I / we worked it out for ourselves  
 Someone else

**Q1.19. Was the explanation of the mesothelioma diagnosis given in an understandable way?**

- Yes, completely  
 Yes, to some extent  
 No  
 Don't know

**Q1.20. Was the explanation given in a sensitive way?**

- Yes  
 Somewhat, but it could have been given more sensitively  
 No  
 Cannot remember

**Q1.21. Did someone explain that a multidisciplinary team had reviewed your case?**

- Yes  No  Don't know

**Q1.22. Have you received all of your care and treatment at the same hospital?**

- Yes, I was diagnosed and treated at the same hospital  
 No, I received my treatment at another hospital

If yes, please go to Q1.24

**Q1.23. If you were referred to another hospital for treatment, has all your treatment continued there?**

- Yes  
 No, I have returned to the hospital where I was diagnosed  
 No, I have shared care between the hospitals

**Q1.24. Was written information provided about treatment and side effects of treatments given to or shared with you?**

- Yes, at the hospital where I was diagnosed  
 Yes, at the hospital where I received my treatment (if these are not the same)  
 No  
 Don't know  
 Can't remember

**Q1.25. Were the appointments with your hospital doctor/team frequent enough?**

- Yes  No

**Q1.26. If you needed to arrange an outpatient appointment how easy was it?**

- Very easy  Very difficult  
 Fairly easy  Don't know  
 Not very easy  I can't remember

**Q1.27. Do you think that the doctors diagnosing mesothelioma knew enough about the condition and treatment?**

- Yes  
 Yes, to some extent  
 No

**Q1.28. Do you think that the doctors treating mesothelioma knew enough about the condition and treatment?**

- Yes  
 Yes, to some extent  
 No

**Q1.29. When you have had CT scans, have you received the results in a timely manner?**

- Yes  No

**Q1.30. Did hospital doctors and nurses do everything they could to help control any breathlessness?**

- I haven't had this symptom  
 Yes, they did  
 Yes, to some extent  
 No, they didn't

**Q1.31. Did hospital doctors and nurses do everything they could to help control any fatigue?**

- I haven't had this symptom  
 Yes, they did  
 Yes, to some extent  
 No, they didn't

**Q1.32. Did hospital doctors and nurses do everything they could to help control any coughing?**

- I haven't had this symptom  
 Yes, they did  
 Yes, to some extent  
 No, they didn't

**Q1.33. Did hospital doctors and nurses do everything they could to help control any pain?**

- I haven't had this symptom  
 Yes, they did  
 Yes, to some extent  
 No, they didn't

**Q1.34. Did the doctors and the nurses give the person with mesothelioma and the family all the information needed to help care at home?**

- Yes, definitely  
 Yes, to some extent  
 Yes, to the person with mesothelioma only  
 No, family and friends were not involved  
 Family or friends did not need the information  
 They did not want the family or friends to be given the information  
 Don't know  
 I can't remember  
 Not applicable at present

**Q1.35. Was good support received from your GP in relation to your mesothelioma diagnosis?**

- Yes definitely  
 Yes, to some extent  
 No

**Q1.36. Were you informed of the name of the Mesothelioma UK Nurse, Nurse Specialist or other keyworker?**

- Yes, Mesothelioma UK Nurse  
 Yes, other Nurse Specialist  
 Yes, other keyworker  
 No  
 Don't know / I can't remember

**Q1.37. Were you informed of a Mesothelioma UK specifically funded nurse?**

- Yes, my nurse specialist is a Mesothelioma UK Nurse  
 Yes, I was informed by my Nurse Specialist, other keyworker  
 No, I was not informed  
 Don't know / I can't remember

**Q1.38. How easy was it to contact your Mesothelioma UK Nurse, other Nurse Specialist or keyworker?**

- Very easy  
 Fairly easy  
 Not very easy  
 Very difficult  
 Don't know / I can't remember

**Q1.39. Does the Mesothelioma UK Nurse, other Clinical Nurse Specialist or keyworker answer important questions in an understandable way?**

- Yes, completely  
 Yes, to some extent  
 No  
 Don't know / I can't remember

**Q1.40. Were you given information about self-help groups or support groups for people with mesothelioma?**

- Yes  
 No  
 Don't know / I can't remember

**Q1.41. Have you attended a patient and carer support group?**

- Yes (if yes, please go to Q1.43)  
 No (if no, please go to Q1.42)

**Q1.42. If no, would you like to have attended a patient and carer support group?**

- Yes  Maybe  No

**Q1.43. Was enough support provided at home (for example district nurses, carers, physiotherapists or occupational therapists)?**

- Yes  
 Yes, to some extent  
 No  
 No, support at home has not been needed

**Q1.44. Was support received from a community palliative care nurse (for example a Macmillan Nurse or Marie Curie Nurse)?**

- Yes  
 Yes, to some extent  
 No  
 No, this support has not been needed

**Q1.45. Was support received in relation to planning care towards the end of life?**

- Yes  
 No  
 Didn't want to discuss it  
 Don't know  
 I can't remember  
 Not applicable at present

**Q1.46. Overall have all the professionals involved in your diagnosis worked well together to provide the best possible care?**

- Yes  
 Yes, to some extent  
 No

**Q1.47. Overall have all the professionals involved in your treatment worked well together to provide the best possible care?**

- Yes  
 Yes, to some extent  
 No

**Q1.48. Has the person with mesothelioma, relative or friend ever been in contact with Mesothelioma UK via telephone, the helpline or email?**

- Yes  
 No  
 Don't know / I can't remember

**Q1.49. Were you given information about how to get financial help or benefits?**

- Yes  
 No  
 Don't know / I can't remember

**Q1.50. Have you been in contact with an asbestos support group?**

- Yes  
 No  
 Don't know / I can't remember

**Q1.51. Were you advised about how to contact a lawyer who specialises in claims for mesothelioma?**

- Yes, at the time of my diagnosis  
 Yes, after the time of my diagnosis  
 No  
 Don't know / I can't remember

**Q1.52. Have clinical trials ever been discussed with you?**

- Yes, at the time of my diagnosis  
 Yes, during or after my treatment  
 No  
 Don't know / I can't remember

**Q1.53. Have you ever been enrolled into a clinical trial?**

- Yes (if yes, please go to Q1.54)  
 No (if no, please go to Q1.56)  
 Don't know / I can't remember (If don't know, please go to Q1.56)

**Q1.54. If you have been enrolled into a clinical trial were you given enough information?**

- Yes  
 No  
 I can't remember

**Q1.55. If you have been enrolled into a clinical trial, can you say approximately how long your journey to the hospital for the trial or to receive treatment takes?**

- less than 30 minutes  151-180 minutes  
 31-60 minutes  181-210 minutes  
 61-90 minutes  210-240 minutes  
 91-120 minutes  more than 240 minutes  
 121-150 minutes

**Q1.56. Regarding treatment for your Mesothelioma were you ever given information about obtaining a second opinion?**

- Yes (if yes, please go to Q1.57)  
 No (if no, please go to Q1.58)  
 Don't know (if don't know, please go to Q1.58)

**Q1.57. If you attended another hospital for a second opinion, can you say approximately how long it takes on each journey for a second opinion?**

- less than 30 minutes     151-180 minutes  
 31-60 minutes         181-210 minutes  
 61-90 minutes         210-240 minutes  
 91-120 minutes        more than 240 minutes  
 121-150 minutes

**Q1.58. Have you been able to claim cost of travel to the hospital where you obtained a second opinion or attended due to a clinical trial?**

- Yes, from the trial itself  
 Yes, from Mesothelioma UK  
 Yes, from another source of funding  
 No, I did not want to claim it  
 Not applicable

**Q1.59. Has the cost of travel insurance for holidays abroad ever been an issue for you?**

- Yes         No

**Q1.60. Have you or are you expecting to have to pay for any private treatment?**

- Yes  
 Yes and provision has been made for this as part of my legal claim  
 No  
 Don't know

Did you know that deaths thought to be due to mesothelioma or other asbestos related diseases are regarded as 'unnatural' and must be referred to the local coroner (procurator fiscal in Scotland) who carries out an investigation?

**Q1.61. Were you or a family member informed about the role of the coroner / procurator fiscal?**

- Yes  
 No  
 Don't know / I can't remember

## Section 2

Quality of Life Assessment Questionnaire

Under each heading, please tick the ONE box that best describes your health TODAY

**MOBILITY**

- I have no problems in walking about
- I have slight problems in walking about
- I have moderate problems in walking about
- I have severe problems in walking about
- I am unable to walk about

**SELF-CARE**

- I have no problems washing or dressing myself
- I have slight problems washing or dressing myself
- I have moderate problems washing or dressing myself
- I have severe problems washing or dressing myself
- I am unable to wash or dress myself

**USUAL ACTIVITIES**

(e.g. work, study, housework, family or leisure activities)

- I have no problems doing my usual activities
- I have slight problems doing my usual activities
- I have moderate problems doing my usual activities
- I have severe problems doing my usual activities
- I am unable to do my usual activities

**PAIN / DISCOMFORT**

- I have no pain or discomfort
- I have slight pain or discomfort
- I have moderate pain or discomfort
- I have severe pain or discomfort
- I have extreme pain or discomfort

**ANXIETY / DEPRESSION**

- I am not anxious or depressed
- I am slightly anxious or depressed
- I am moderately anxious or depressed
- I am severely anxious or depressed
- I am extremely anxious or depressed

- We would like to know how good or bad your health is TODAY
- This scale is numbered from 0 to 100.
- 100 means the best health you can imagine. 0 means the worst health you can imagine.
- Mark an X on the scale to indicate how your health is TODAY.
- Now, please write the number you marked on the scale in the box.

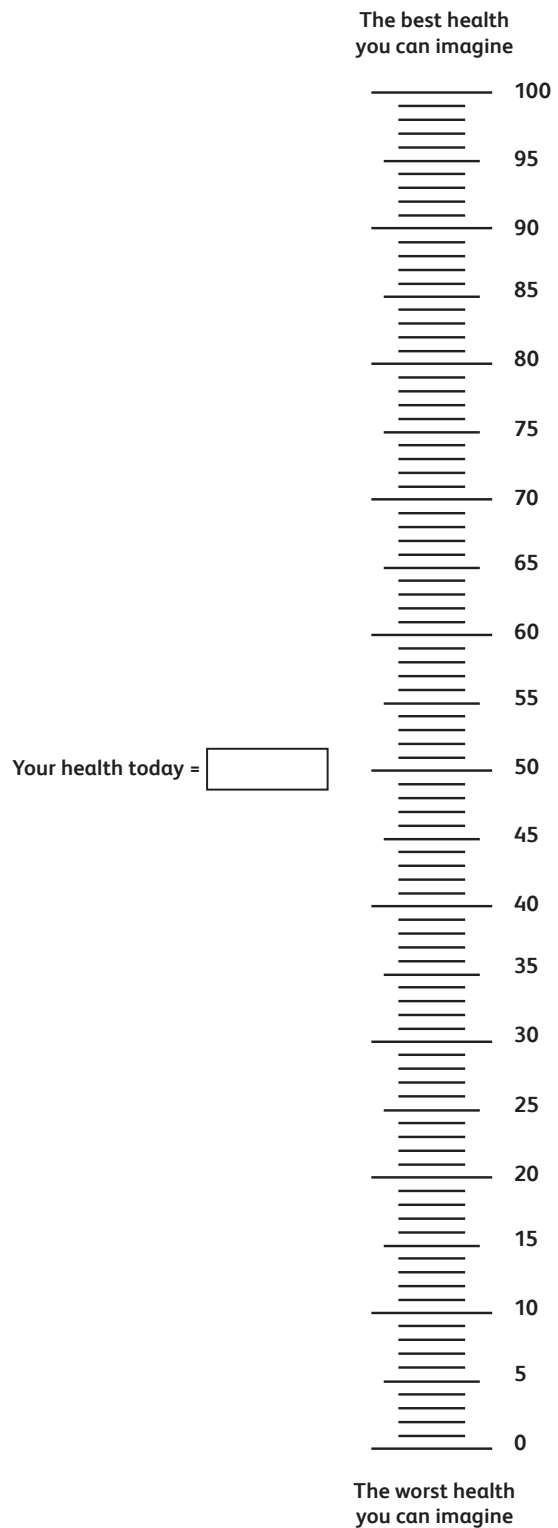



### Section 3

Clinical Management of Mesothelioma.  
(To be validated with a clinical nurse)

#### Q3.1. What was the location of your tumour at diagnosis?

Tick as many as apply

- Left Pleural  
 Right Pleural  
 Peritoneal  
 More than one place  
 Other

#### Q3.2. What type of Mesothelioma do you have?

- Epithelioid  
 Sarcomatoid  
 Mixed/Biphasic  
 Unspecified  
 Don't know (To be validated by the nurse and classified to one of the above)

#### Q3.3. What was the stage of tumour at diagnosis?

- Suitable for surgery  
 Unsuitable for surgery  
 Suitable for surgery but I declined  
 Not staged  
 Don't know (nurse to fill in one of above)

#### Q3.4 Which of the following procedures have you previously undergone?

Tick as many as apply

- CT scan ([please go to Q3.5](#))  
 Ultrasound scan  
 PET scan  
 MRI scan  
 CT guided biopsy  
 Bronchoscopy Laparoscopy  
 Fluid drained from the lung ([please go to Q3.6](#))  
 Fluid drained from the abdomen  
 Permanent or indwelling drain (Pleurx/Rocket)  
 Thoracoscopy with local anaesthetic, ie awake  
 Thoracoscopy with general anaesthetic/asleep  
 Surgical biopsy

#### Q3.5. Within the last year how many CT scans have you received?

- 0  
 1-2  
 3-4  
 5+

If you had fluid drained from the lung

#### Q3.6. How many times in total have you had fluid drained from the lung?

- 0  3  
 1  4  
 2  5+

#### Q3.7. Were you offered a permanent or indwelling drain?

- Yes  No  Don't know

#### Q3.8. Which of the following treatments (either in or out of a clinical trial) have you been offered but not taken?

Tick as many as apply

- Surgery  
 Radiotherapy  
 Chemotherapy  
 Immunotherapy  
 Targeted Therapy  
 None

#### Q3.9. Which of the following treatments (either in or out of a clinical trial) have you received to date?

Tick as many as apply

- Surgery ([please go to Q3.10](#))  
 Radiotherapy ([please go to Q3.18](#))  
 Chemotherapy ([please go to Q3.26](#))  
 Immunotherapy  
 Targeted Therapy  
 None

If you are currently or have previously received surgery for your mesothelioma can you provide the month and year when you received this treatment and what was it for? Q3.10 – Q3.17

Complete as many as apply

#### Q3.10. First surgical procedure

Please write 1st of month and year

#### Q3.11. What was it for?

Tick as many as apply

- Biopsy  
 Biopsy and drain fluid combined  
 Drain fluid  
 Remove some of the tumour  
 Remove all of the tumour  
 Address complications of surgery  
 Other

**Q3.12. Have you had a second procedure?** Yes  No**Q3.13. Second surgical procedure***Please write 1st of month and year***Q3.14. What was it for?***Tick as many as apply*

- Biopsy
- Biopsy and drain fluid combined
- Drain fluid
- Remove some of the tumour
- Remove all of the tumour
- Address complications of surgery
- Other

**Q3.15. Have you had a third procedure?** Yes  No**Q3.16. Third surgical procedure***Please write 1st of month and year***Q3.17. What was it for?***Tick as many as apply*

- Biopsy
- Biopsy and drain fluid combined
- Drain fluid
- Remove some of the tumour
- Remove all of the tumour
- Address complications of surgery
- Other

**If you are currently or have previously received radiotherapy for your mesothelioma can you provide the month and year when you received this treatment and what was it for? Q3.18 – Q3.25**

*Complete as many as apply***Q3.18. First course of radiotherapy***Please write 1st of month and year***Q3.19. What was it for?***Tick as many as apply*

- To prevent tumour from spreading
- To reduce a lump
- To treat area/s of disease growth
- To treat an area of disease causing pain

**Q3.20. Have you had a second course of radiotherapy?** Yes  No**Q3.21. Second course of radiotherapy***Please write 1st of month and year***Q3.22. What was it for?***Tick as many as apply*

- To prevent tumour from spreading
- To reduce a lump
- To treat area/s of disease growth
- To treat an area of disease causing pain

**Q3.23. Have you had a third course of radiotherapy?** Yes  No**Q3.24. Third course of radiotherapy***Please write 1st of month and year***Q3.25. What was it for?***Tick as many as apply*

- To prevent tumour from spreading
- To reduce a lump
- To treat area/s of disease growth
- To treat an area of disease causing pain

**If you are currently receiving or have previously received chemotherapy for your mesothelioma can you provide the following information. Q3.26–Q3.41**

**Q3.26. First course of chemotherapy***Please write 1st of month and year***Q3.27. Was this as part of a Clinical Trial?** Yes  No

**Q3.28. What was the treatment?**

- Pemetrexed and Cisplatin
- Pemetrexed and Carboplatin
- Pemetrexed as a single drug
- Pemetrexed, Cisplatin and Bevacizumab (Avastin)
- Pemetrexed, Carboplatin and Bevacizumab (Avastin)
- Bevacizumab (Avastin) as a single drug
- Gemcitabine and Cisplatin
- Gemcitabine and Carboplatin
- Vinorelbine
- Any other drugs in a clinical trial
- Any other drugs not in a clinical trial

**Q3.29. How many cycles did you complete?**

- 1  5
- 2  6
- 3  More than 6, still receiving it
- 4

**Q3.30. Did you continue on maintenance treatment?**

- Yes  No

**Q3.31. Did you have a second course of chemotherapy?**

- Yes  No

**Q3.32. Second course of chemotherapy**

Please write 1st of month and year

**Q3.33. Was this as part of a Clinical Trial?**

- Yes  No

**Q3.34. What was the treatment?**

- Pemetrexed and Cisplatin
- Pemetrexed and Carboplatin
- Pemetrexed as a single drug
- Pemetrexed, Cisplatin and Bevacizumab (Avastin)
- Pemetrexed, Carboplatin and Bevacizumab (Avastin)
- Bevacizumab (Avastin) as a single drug
- Gemcitabine and Cisplatin
- Gemcitabine and Carboplatin
- Vinorelbine
- Any other drugs in a clinical trial
- Any other drugs not in a clinical trial

**Q3.35. How many cycles did you complete?**

- 1  5
- 2  6
- 3  More than 6, still receiving it
- 4

**Q3.36. Did you continue on maintenance treatment?**

- Yes  No

**Q3.37. Did you have a third course of chemotherapy?**

- Yes  No

**Q3.38. Third course of chemotherapy**

Please write 1st of month and year

**Q3.39. Was this as part of a Clinical Trial?**

- Yes  No

**Q3.40. What was the treatment?**

- Pemetrexed and Cisplatin
- Pemetrexed and Carboplatin
- Pemetrexed as a single drug
- Pemetrexed, Cisplatin and Bevacizumab (Avastin)
- Pemetrexed, Carboplatin and Bevacizumab (Avastin)
- Bevacizumab (Avastin) as a single drug
- Gemcitabine and Cisplatin
- Gemcitabine and Carboplatin
- Vinorelbine
- Any other drugs in a clinical trial
- Any other drugs not in a clinical trial

**Q3.41. How many cycles did you complete?**

- 1  5
- 2  6
- 3  More than 6, still receiving it
- 4

**Q3.42. Did you continue on maintenance treatment?**

- Yes  No

**Q3.43. At this current moment in time what of the following best describes you?**

- I have had surgery but no other treatment and my disease is stable
- I have never received any treatment and my disease is stable
- I have never received any treatment and my disease is active/progressing
- I am waiting to start my first course of chemotherapy
- I am currently receiving chemotherapy for the first time
- I have previously received chemotherapy once and my disease is stable
- I have previously received chemotherapy once, but my disease is active/progressing
- I am currently receiving treatment (chemotherapy/ immunotherapy/targeted therapy) for the second time as my disease is active/progressing

- I have previously received treatment (chemotherapy/immunotherapy/targeted therapy) twice and my disease is stable
- I have previously received treatment (chemotherapy/immunotherapy/targeted therapy) twice, the treatment is now ineffective, and my disease is active/progressing
- I have received 3 or more treatments (chemotherapy/immunotherapy/targeted therapy) and my disease is stable
- I have received 3 or more treatments (chemotherapy/immunotherapy/targeted therapy), the treatment is now ineffective and my disease is progressing

**Q3.44. Do you know your current performance status, (known as ECOG), which is scored on a scale of 0 to 4?**

- Yes (*if yes, please go to Q3.45*)
- No (*if no, please go to Q3.46*)

**Q3.45. What is the status score that has been given to you?**

- 0: Fully active, able to carry on all pre-disease performance without restriction
- 1: Restricted in physically strenuous activity but ambulatory and able to carry out work of a light or sedentary nature e.g. light housework, office.
- 2: Ambulatory and capable of all selfcare but unable to carry out any work activities. Up and about more than 50% of waking hours.
- 3: Capable of only limited selfcare, confined to bed or chair for 50% of waking hours.
- 4: Completely disabled. Cannot carry out any selfcare. Totally confined to bed or chair.

**Q3.46. Your Mesothelioma Nurse will tick the performance score on your behalf**

- 0: Fully active, able to carry on all pre-disease performance without restriction
- 1: Restricted in physically strenuous activity but ambulatory and able to carry out work of a light or sedentary nature e.g. light housework, office.
- 2: Ambulatory and capable of all selfcare but unable to carry out any work activities. Up and about more than 50% of waking hours.
- 3: Capable of only limited selfcare, confined to bed or chair for 50% of waking hours.
- 4: Completely disabled. Cannot carry out any selfcare. Totally confined to bed or chair.

If you have any further comments you would like to share please email Mesothelioma UK at [info@mesothelioma.uk.com](mailto:info@mesothelioma.uk.com)

**Q3.47. Name of MESO Nurse**

- to be supplied by MESO UK
- Unknown

**Q3.48. Please enter your unique patient identifier**

**Q3.49. Name of hospital**

You have now completed this questionnaire.

Please confirm if Section 3 has been validated by the Meso UK nurse

- Yes
- No, to be validated later

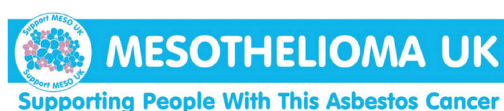

Supplement: bmjresp-2021-001050supp001.pdf [file bmjresp-2021-001050supp001.pdf]
